# Supplementary material for: Highly stretchable, supersensitive, and self-adhesive ionohydrogels using waterborne polyurethane micelles as cross-linkers for wireless strain sensors
Source: Royal Society of Chemistry journal article supplement (doi:10.1039/d3tb00495c), 2023-01-01
Supplement: d3tb00495c1.pdf [file d3tb00495c1.pdf]

## Supporting Information

### Highly Stretchable, Supersensitive, and Self-Adhesive Ionohydrogel using Waterborne Polyurethane Micelles as Cross-linker for Wireless Strain Sensor

Lingling Lei,<sup>a, c</sup> Haibo Wang,<sup>a, c</sup> Qihan Jia,<sup>a</sup> Yali Tian,<sup>b\*</sup> Shuang Wang<sup>a, c\*</sup>

<sup>a</sup> College of Biomass Science and Engineering, Sichuan University, Chengdu 610065,  
PR China. Tel: +86-28-85401296.

<sup>b</sup> West China School of Nursing/West China Hospital, Chengdu 610065, PR China.

<sup>c</sup> The Key Laboratory of Leather Chemistry and Engineering of Ministry of Education,  
Sichuan University, Chengdu 610065, PR China.

#### Corresponding Author

\*E-mail addresses: [shuangshine7@scu.edu.cn](mailto:shuangshine7@scu.edu.cn) (S. Wang) and [tianyali@wchscu.cn](mailto:tianyali@wchscu.cn) (Y.-  
L. Tian)

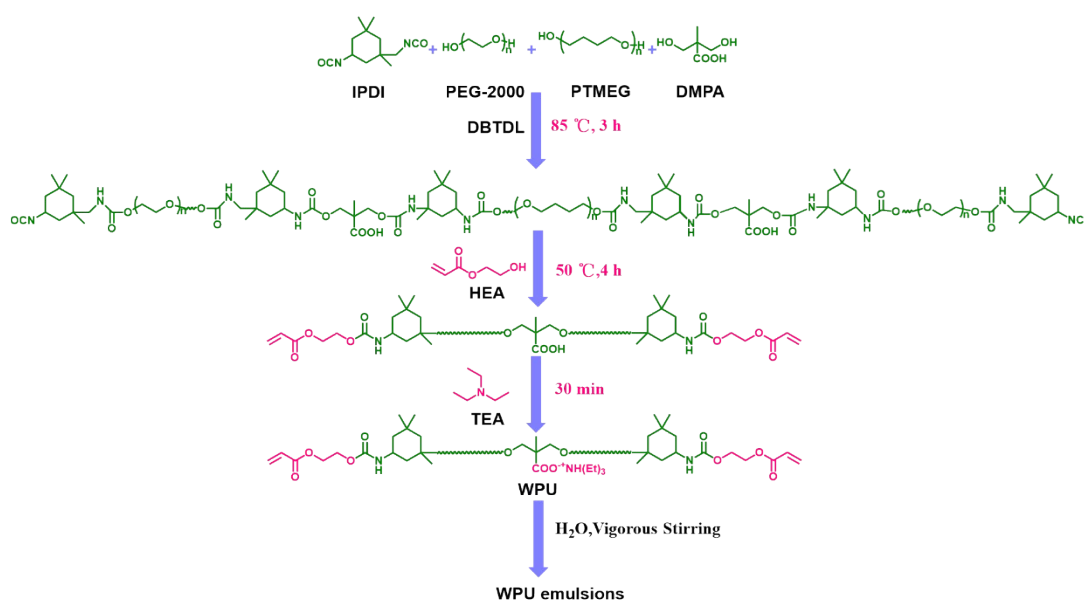

Scheme S1. Synthetic route to WPU micelles.

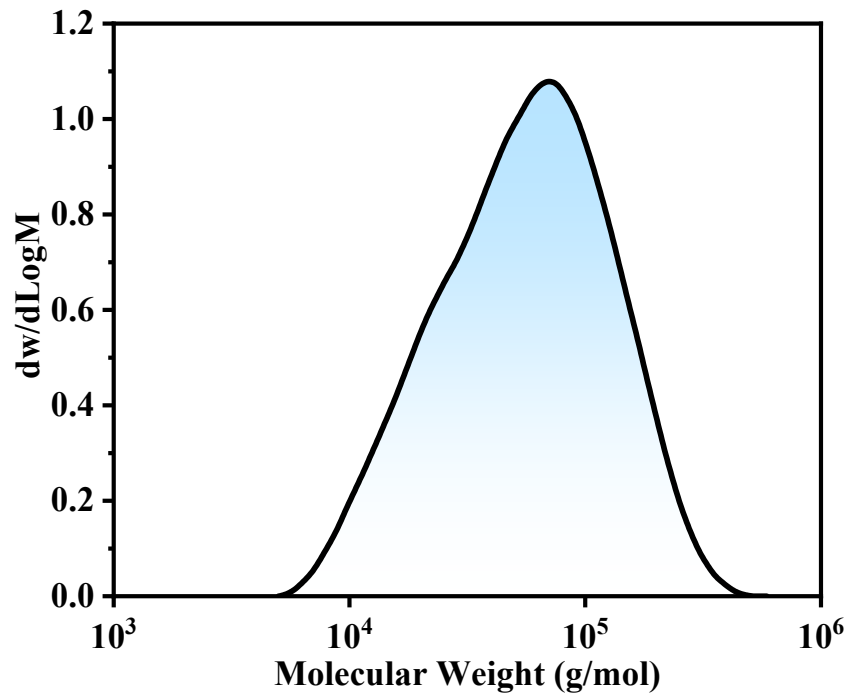

Fig. S1. Gel permeation chromatography results for WPU.

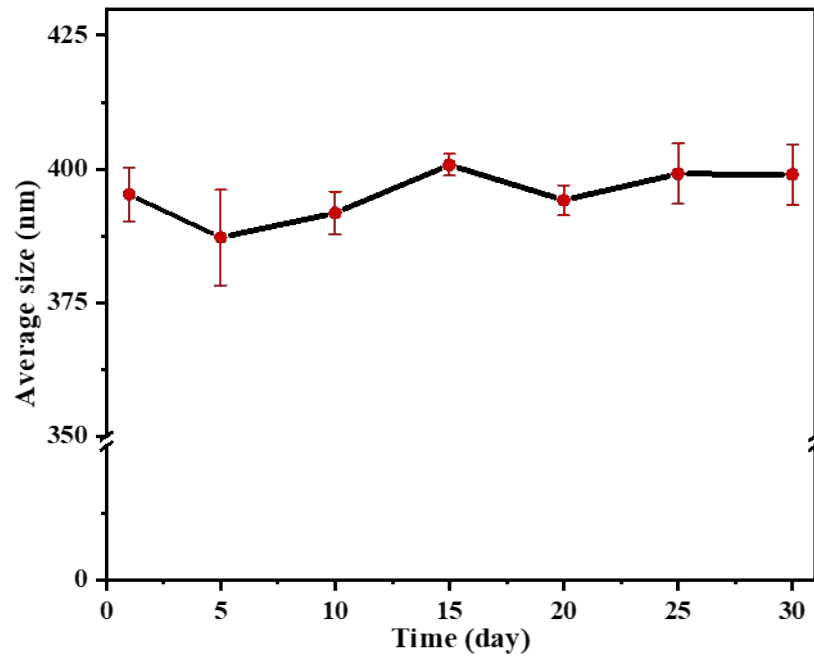

Fig. S2. Average size of WPU emulsions.

Table S1. Performance summary of representative hydrogel-based sensors.

| Gel network | Gauge | Elongation at | Fracture | Adhesion | Resilience | Refs |
|-------------|-------|---------------|----------|----------|------------|------|
|-------------|-------|---------------|----------|----------|------------|------|

| components                                   | factor | break<br>(%) | toughness<br>(MJ/m <sup>3</sup> ) | strength<br>(kPa)          | (%)                                                       |     |
|----------------------------------------------|--------|--------------|-----------------------------------|----------------------------|-----------------------------------------------------------|-----|
| Acrylic<br>acid/AlCl <sub>3</sub> /Cellulose | 1.34   | 1100%        | 7.5                               | /                          | 42.9% (300%<br>strain;<br>Waiting 15 min)*                | S1  |
| AAM/PGlu                                     | ~2.35  | >1800%       | >10                               | 41.5 kPa<br>(on<br>copper) | ~91.0% (First<br>cycle; 500%<br>strain;<br>Immediately)** | S2  |
| PVA/NaCl                                     | ~2.1   | 550%         | 4.7                               | /                          | /                                                         | S3  |
| PVA-GL-PANI                                  | /      | 460%         | 12                                | /                          | /                                                         | S4  |
| Gelatin                                      | /      | 320%         | 0.13                              | /                          | ~92.5% (165%<br>strain)**                                 | S5  |
| MXene/PHMP                                   | 7.17   | 667%         | /                                 | 16 kPa                     | /                                                         | S6  |
| CS-PHEAA                                     | 6.9    | 692%         | 23.13                             | /                          | 78.3% (20°C;<br>Waiting 20 min)*                          | S7  |
| PVA/PANI                                     | 7.7    | 242%         | /                                 | /                          | /                                                         | S8  |
| Aa (Ta) /AAM                                 | /      | 2153%        | 1.5                               | /                          | 76.2% (Waiting<br>10 min)*                                | S9  |
| PAA-HACC                                     | 11.65  | ~1600%       | 5.06                              | /                          | /                                                         | S10 |
| Acrylic<br>acid/PEGDA                        | 5      | 1200%        | /                                 | /                          | ~80% (100%<br>strain;                                     | S11 |

---

|            |    |       |     |          |                      |              |
|------------|----|-------|-----|----------|----------------------|--------------|
|            |    |       |     |          | Waiting 1<br>min)*** |              |
| PAM-WPU/IL | 35 | 2927% | 0.3 | 46.01kPa | 80.01%               | This<br>work |

---

\*, \*\* and \*\*\* denote the resilience represented by energy dissipation, strain or stress, respectively.

S1 C.-W. Lai & S.-S. Yu. 3D printable strain sensors from deep eutectic solvents and cellulose nanocrystals. *ACS Appl. Mater. Interfaces* 12, 34235-34244 (2020).

S2 Zhang, Y., et al., Peptide-enhanced tough, resilient and adhesive eutectogels for highly reliable strain/pressure sensing under extreme conditions. *Nature Communications*, 2022. 13(1): p. 6671.

S3 Wang, Q., et al., Muscle-Inspired Anisotropic Hydrogel Strain Sensors. *ACS Applied Materials & Interfaces*, 2022. 14(1): p. 1921-1928.

S4 Ma, Y., et al., Skin-Contactable and Antifreezing Strain Sensors Based on Bilayer Hydrogels. *Chemistry of Materials*, 2020. 32(20): p. 8938-8946.

S5 H. Qin, R. E. Owyung, S. R. Sonkusale & M. J. Panzer. Highly stretchable and nonvolatile gelatin-supported deep eutectic solvent gel electrolyte-based ionic skins for strain and pressure sensing. *J. Mater. Chem. C* 7, 601-608 (2019).

S6 He, S., et al., Bio-Inspired Instant Underwater Adhesive Hydrogel Sensors. *ACS Applied Materials & Interfaces*, 2022. 14(40): p. 45869-45879.

S7 Yang, Y., et al., Anti-freezing, resilient and tough hydrogels for sensitive and large-range strain and pressure sensors. *Chemical Engineering Journal*, 2021. 403: p. 126431.

S8 Zhou, H., et al., Capacitive Pressure Sensors Containing Reliefs on Solution-

Processable Hydrogel Electrodes. *ACS Applied Materials & Interfaces*, 2021. 13(1): p. 1441-1451.

S9 Zhang, Q., et al., Ultra-stretchable wearable strain sensors based on skin-inspired adhesive, tough and conductive hydrogels. *Chemical Engineering Journal*, 2019. 365: p. 10-19.

S10 Wang, T., et al., Adhesive and tough hydrogels promoted by quaternary chitosan for strain sensor. *Carbohydrate Polymers*, 2021. 254: p. 117298.

S11 G. Li, et al. A stretchable and adhesive ionic conductor based on polyacrylic acid and deep eutectic solvents. *npj Flex. Electron.* 5, 23 (2021).
